# Supplementary material
Source: publisher figshare collection journal article supplement (https://acs.figshare.com/ndownloader/files/13832774)
Supplement: Supplementary file 1 [file 13832774]

## Supporting Information:

### **RNA-binding proteomics reveals MATR3 interacting with lncRNA SNHG1 to enhance neuroblastoma progression**

Tz-Wen Yang<sup>1#</sup>, Divya Sahu<sup>2#</sup>, Yi-Wen Chang<sup>3#</sup>, Chia-Lang Hsu<sup>3,4</sup>, Chiao-Hui Hsieh<sup>1</sup>, Hsuan-Cheng Huang<sup>2\*</sup>, Hsueh-Fen Juan<sup>1,3\*</sup>

<sup>1</sup>Institute of Molecular and Cellular Biology, National Taiwan University, Taipei 106, Taiwan

<sup>2</sup>Institute of Biomedical Informatics, National Yang-Ming University, Taipei 112, Taiwan

<sup>3</sup>Department of Life Science, National Taiwan University, Taipei 106, Taiwan

<sup>4</sup>Department of Medical Research, National Taiwan University Hospital, Taipei 100, Taiwan

#These authors contributed equally to this work

#### ***Correspondence to:***

Hsuan-Cheng Huang, Ph.D.

Institute of Biomedical Informatics, National Yang-Ming University, No. 155, Sec. 2, Linong St., 112 Taipei, Taiwan. Tel: +886-2-28267357; E-mail: [hsuancheng@ym.edu.tw](mailto:hsuancheng@ym.edu.tw)

Hsueh-Fen Juan, Ph.D.

Department of Life Science, Institute of Molecular and Cellular Biology, National Taiwan University, No. 1, Sec. 4, Roosevelt Rd., 106 Taipei, Taiwan. Tel: +886-2-3366-4536; Fax: +886-2-23673374; E-mail: [yukijuan@ntu.edu.tw](mailto:yukijuan@ntu.edu.tw)

**Figure S1.** The mass spectrum of candidate proteins.

**Table S1.** The list of identified proteins interacting with SNHG1 in SK-N-BE(2)C cells. Protein identification was performed by MaxQuant Version 1.5.2.8.

**Table S2.** The list of identified proteins interacting with SNHG1 in SK-N-DZ cells. Protein identification was performed by MaxQuant Version 1.5.2.8.

**Table S3.** The list of identified proteins interacting with SNHG1 in SK-N-AS cells. Protein identification was performed by MaxQuant Version 1.5.2.8.

**Table S4.** GSEA report for SNHG1 positive correlated genes.

**Table S5.** GSEA report for MATR3 positive correlated genes.

**a****Evidence ID: 5238 YBX1**

Retention time: 29.395; m/z: 848.44; Charge: 2; Coverage: 46.6%

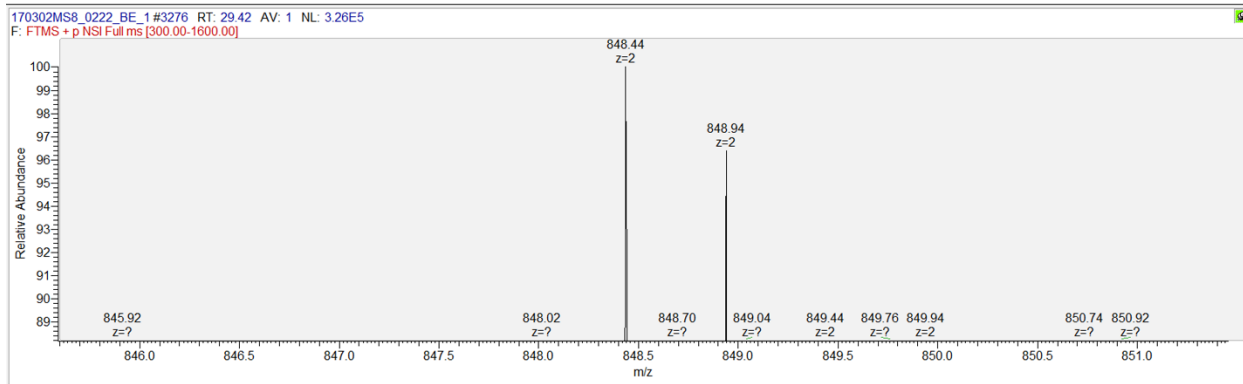**b****Evidence ID: 1154 MATR3**

Retention time: 41.728; m/z: 439.24; Charge: 2; Coverage: 45.3%

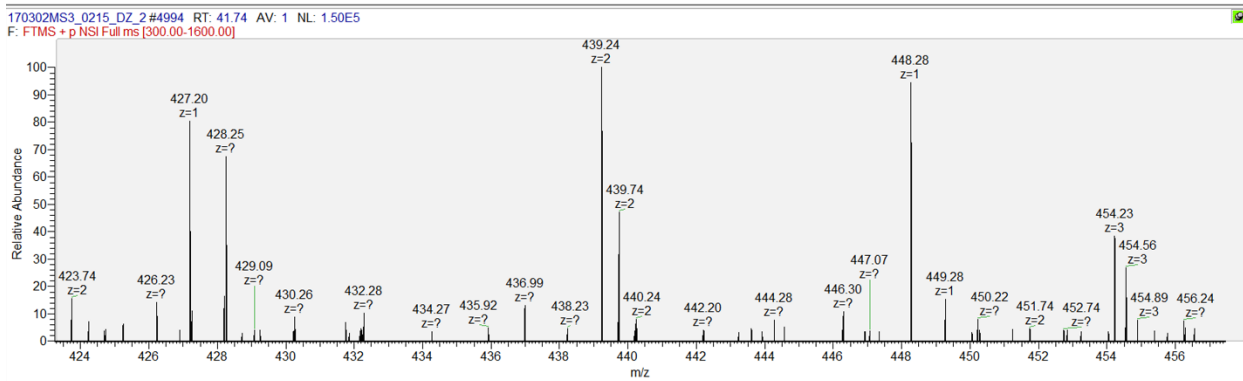**c****Evidence ID: 2800 DDX5**

Retention time: 49.505; m/z: 525.77; Charge: 2; Coverage: 42.5%

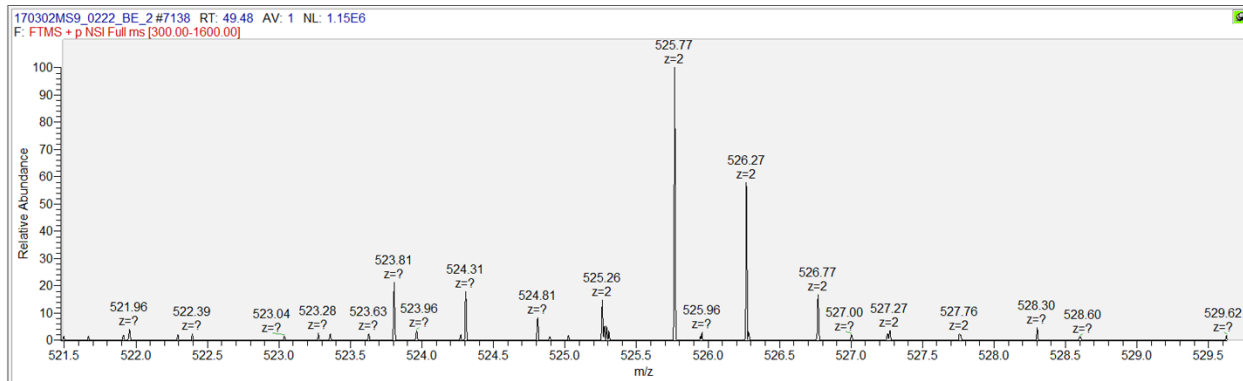

**Figure S1. The mass spectrum of candidate proteins.** The MS/MS spectrum of YBX1 (A), MATR3 (B) and DDX5 (C). The retention time, m/z and charge of YBX1, MATR3 and DDX5 were obtained from proteomics data.
